# Supplementary material for: Less is more: a perspective on thinning lithium metal towards high-energy-density rechargeable lithium batteries
Source: Royal Society of Chemistry journal article supplement (doi:10.1039/d2cs00606e), 2023-01-01
Supplement: d2cs00606e1.pdf [file d2cs00606e1.pdf]

## **Less is More: A Perspective on Thinning Lithium Metal Towards High-Energy-Density Rechargeable Lithium Batteries**

Wangyan Wu,<sup>1,2</sup> Wei Luo<sup>1,2\*</sup> and Yunhui Huang<sup>3\*</sup>

<sup>1</sup>Institute of New Energy for Vehicles, Shanghai Key Lab. of D&A for Metal-Functional Materials, School of Materials Science and Engineering, Tongji University, Shanghai 201804, China;

<sup>2</sup>Key Laboratory of Advanced Civil Engineering Materials of Ministry of Education, School of Materials Science and Engineering, Tongji University, Shanghai 201804, China

<sup>3</sup>State Key Laboratory of Material Processing and Die & Mould Technology, School of Materials Science and Engineering, Huazhong University of Science and Technology, Wuhan, Hubei 430074, China

Email: [weiluo@tongji.edu.cn](mailto:weiluo@tongji.edu.cn) and [huangyh@hust.edu.cn](mailto:huangyh@hust.edu.cn)

## **Table of Contents**

Table S1 The definition of Li foils' thickness in previous literatures

Table S2 Thin Li fabrication techniques and their corresponding details

Note 1 The correspondence of a Li metal anode thickness and its areal capacity

Note 2 The correlation between cycle life and the thickness of LMAs and corresponding  $CE_{avg}$  of a battery

**Table S1 The definition of Li foils' thickness in previous literatures**

| The thickness of Li foils/ $\mu\text{m}$<br>(the areal capacity of used Li) | The description/definition<br>of the thickness of Li foils | Reference                                                                           |
|-----------------------------------------------------------------------------|------------------------------------------------------------|-------------------------------------------------------------------------------------|
| 400 (80 mAh/cm <sup>2</sup> )                                               | thick                                                      | J. Phys. Chem. C,<br>2018, 122,<br>21462–21467                                      |
| 10 (2 mAh/cm <sup>2</sup> )                                                 | thin                                                       |                                                                                     |
| 100 or 50                                                                   | thick                                                      | Nat. Energy, 2021, 6,<br>723-732                                                    |
| 20                                                                          | thin/ultrathin                                             |                                                                                     |
| 125                                                                         | thick                                                      | Chem. Commun.,<br>2015, 51, 17100                                                   |
| 30                                                                          | thin                                                       |                                                                                     |
| 50                                                                          | ultrathin                                                  | Adv. Mater. 2019, 31,<br>1902785;<br>Energy Environ.<br>Mater. 2020, 3, 160–<br>165 |
| 30                                                                          | very thin                                                  | Batteries &<br>Supercaps 2020, 3,<br>1370–1376                                      |
| < 50                                                                        | thin                                                       | Proc. Natl. Acad. Sci.<br>U.S.A., 2020, 117,<br>27195-27203                         |
| 10-20                                                                       | ultrathin                                                  | Nat. Commun., 2019,<br>10, 4930                                                     |
| > 100                                                                       | thick                                                      | ACS Appl. Mater.<br>Interfaces, 2018, 10,<br>16521–16530                            |
| 40                                                                          | thin                                                       |                                                                                     |
| 20                                                                          | ultrathin                                                  | Adv. Energy Mater.,<br>2021, 11, 2003769                                            |
| 0.5 - 20                                                                    | ultrathin                                                  | Nat. Energy, 2021, 6,<br>790-798                                                    |
| 50 - 100                                                                    | very thick                                                 | Nano Lett., 2022, 22,<br>3047-3053                                                  |
| < 15                                                                        | ultrathin                                                  |                                                                                     |
| 10 - 50                                                                     | ultrathin                                                  | Adv. Energy Mater.,<br>2021, 11, 2102259                                            |
| 1 - 30                                                                      | ultrathin                                                  | Chem. Eng. J. Adv.,<br>2022, 9 100218                                               |
| 15                                                                          | ultrathin                                                  | Adv. Mater., 2021,<br>2005305                                                       |
| < 30                                                                        | ultrathin                                                  | Nano Energy, 2020,<br>74, 104817                                                    |

**Table S2 Thin Li fabrication techniques and their corresponding details**

This is presented as an independent table in the supplementary information.

**Note 1 The correspondence of a Li metal anode thickness and its areal capacity**

As we know, metallic Li at normal temperature (20 °C) and pressure (101.325 kPa) possesses a density ( $\rho$ ) of 0.534 g/cm<sup>3</sup>, and a theoretical gravimetric capacity of ~ 3860 mAh/g. Accordingly, we can obtain the theoretical volumetric capacity of 2061.24 mAh/cm<sup>3</sup>. Thus, an areal capacity of ~ 1 mAh/cm<sup>2</sup> corresponds to a thickness of 1/2061.24 cm, namely 4.85  $\mu$ m. Here, for the convenience of memory, we say 5  $\mu$ m is equivalent to ~ 1 mAh/cm<sup>2</sup>.

**Note 2 The correlation between cycle life and the thickness of LMAs and corresponding  $CE_{avg}$  of a battery**

Here, we assume a battery consists of an Li metal anode of various thickness and a Li-containing cathode with an areal capacity of 4 mAh/cm<sup>2</sup>. First, we assume charging to 100% state-of-charge, and the possible Li loss occurs only at the Li metal anode side. In this case, the capacity passed per cycle ( $Q_{Li\ passed\ per\ cycle}$ ) is equivalent to the cathode capacity ( $Q_{cathode}$ , namely 4 mAh/cm<sup>2</sup>) if there are extra Li in anode side to compensate for Li losses. We define the battery reaching its end when it runs out all of the Li from the Li-metal anode ( $Q_{Li}$ ) and 20% of the Li from the cathode ( $Q_{cathode}$ ) after  $n$  cycles. Then we can calculate the averaged Coulombic efficiency ( $CE_{avg}$ ) for Li plating/stripping processes on the anode side as follows:

$$CE_{avg} = 1 - \left( \frac{Q_{Li} + 0.2Q_{cathode}}{n} \right) \times \left( \frac{1}{Q_{Li\ passed\ per\ cycle}} \right) = 1 - \frac{Q_{Li} + 0.2Q_{cathode}}{nQ_{cathode}}$$

Among which, the term  $(Q_{Li} + 0.2Q_{cathode})/n$  represents the average Li loss per cycle.

On this basis, we then define the fraction of Li passed per cycle ( $F_p$ ) as follows:

$$F_p = \frac{Q_{cathode}}{Q_{cathode} + Q_{Li}}$$

Combining the above two equation, we can get a relation between ( $F_p$ ) and cycle life ( $n$ ), namely

$$F_p = \frac{1}{n(1 - CE_{avg}) + 0.8}$$

Based on this equation, we can calculate the cycle life of Li meta batteries with anodes of different thickness. For example, when we have a 50 μm Li metal anode (5 μm is

almost equivalent to 1 mAh/cm<sup>2</sup>) and a  $CE_{avg}$  of 80%, then we can get a  $F_p$  value of 4/14 and a cycle life of 13.5.

For more detailed process, please refer to the article of Zhu et al (*Proc. Natl. Acad. Sci. U.S.A.*, 2020, 117, 27195-27203).
